# Supplementary material for: Designing online species identification tools for biological recording: the impact on data quality and citizen science learning
Source: PeerJ. 2019 Jan 28;6:e5965. doi: 10.7717/peerj.5965 (PMC6354666; doi:10.7717/peerj.5965)
Supplement: Supplemental Information 1 [file peerj-07-5965-s001.csv]

Participant ID	Order of identification task	Image difficulty	Interface type	Accuracy	Workload	Time
1	1	Easy	Field Guide	Incorrect	63.67	00:03:52
1	2	Easy	Feature Selection	Correct	51.67	00:02:38
1	3	Easy	Decision Tree	Incorrect	45.00	00:02:49
1	4	Difficult	Field Guide	Incorrect	66.00	00:04:24
1	5	Difficult	Feature Selection	Correct	46.67	00:02:58
1	6	Difficult	Decision Tree	Correct	46.33	00:04:36
2	6	Easy	Field Guide	Incorrect	48.33	00:02:14
2	1	Easy	Feature Selection	Incorrect	40.33	00:03:25
2	2	Easy	Decision Tree	Incorrect	24.67	00:01:07
2	3	Difficult	Field Guide	Incorrect	62.00	00:04:18
2	4	Difficult	Feature Selection	Incorrect	31.33	00:01:55
2	5	Difficult	Decision Tree	Correct	27.67	00:03:07
3	5	Easy	Field Guide	Correct	32.00	00:01:42
3	6	Easy	Feature Selection	Correct	28.67	00:02:01
3	1	Easy	Decision Tree	Incorrect	37.67	00:02:24
3	2	Difficult	Field Guide	Incorrect	59.67	00:03:40
3	3	Difficult	Feature Selection	Incorrect	22.00	00:01:06
3	4	Difficult	Decision Tree	Incorrect	19.33	00:01:39
4	4	Easy	Field Guide	Incorrect	63.00	00:03:39
4	5	Easy	Feature Selection	Correct	41.33	00:02:57
4	6	Easy	Decision Tree	Correct	53.00	00:02:35
4	1	Difficult	Field Guide	Incorrect	65.67	00:03:13
4	2	Difficult	Feature Selection	Incorrect	58.33	00:04:18
4	3	Difficult	Decision Tree	Incorrect	46.33	00:03:23
5	3	Easy	Field Guide	Incorrect	68.00	00:02:02
5	4	Easy	Feature Selection	Correct	47.67	00:02:09
5	5	Easy	Decision Tree	Incorrect	45.33	00:01:59
5	6	Difficult	Field Guide	Incorrect	44.67	00:01:33
5	1	Difficult	Feature Selection	Incorrect	64.33	00:04:00
5	2	Difficult	Decision Tree	Incorrect	38.33	00:00:58
6	2	Easy	Field Guide	Incorrect	53.33	00:02:00
6	3	Easy	Feature Selection	Correct	45.00	00:01:37
6	4	Easy	Decision Tree	Correct	40.33	00:00:52
6	5	Difficult	Field Guide	Incorrect	45.00	00:01:23
6	6	Difficult	Feature Selection	Incorrect	44.67	00:01:02
6	1	Difficult	Decision Tree	Incorrect	43.67	00:01:35
7	3	Easy	Field Guide	Incorrect	25.33	00:02:07
7	1	Easy	Feature Selection	Incorrect	30.00	00:02:11
7	2	Easy	Decision Tree	Incorrect	19.67	00:01:03
7	6	Difficult	Field Guide	Incorrect	16.33	00:01:33
7	4	Difficult	Feature Selection	Incorrect	20.00	00:02:04
7	5	Difficult	Decision Tree	Incorrect	8.33	00:00:42
8	2	Easy	Field Guide	Correct	9.00	00:00:27
8	6	Easy	Feature Selection	Correct	20.67	00:01:19
8	1	Easy	Decision Tree	Incorrect	22.67	00:02:00
8	5	Difficult	Field Guide	Incorrect	11.67	00:01:17
8	3	Difficult	Feature Selection	Correct	51.67	00:03:52
8	4	Difficult	Decision Tree	Correct	20.67	00:00:59
9	1	Easy	Field Guide	Correct	43.00	00:02:24
9	5	Easy	Feature Selection	Correct	15.33	00:02:53
9	6	Easy	Decision Tree	Incorrect	40.00	00:00:31
9	4	Difficult	Field Guide	Incorrect	39.67	00:01:01
9	2	Difficult	Feature Selection	Correct	38.00	00:02:31
9	3	Difficult	Decision Tree	Correct	37.33	00:03:41
10	6	Easy	Field Guide	Correct	12.67	00:01:54
10	4	Easy	Feature Selection	Incorrect	18.67	00:02:56
10	5	Easy	Decision Tree	Incorrect	17.00	00:02:54
10	3	Difficult	Field Guide	Correct	28.33	00:01:55
10	1	Difficult	Feature Selection	Incorrect	13.33	00:03:17
10	2	Difficult	Decision Tree	Correct	18.33	00:01:31
11	5	Easy	Field Guide	Correct	32.67	00:01:32
11	3	Easy	Feature Selection	Correct	20.00	00:01:20
11	4	Easy	Decision Tree	Correct	33.67	00:02:41
11	2	Difficult	Field Guide	Incorrect	52.33	00:03:25
11	6	Difficult	Feature Selection	Correct	57.33	00:06:41
11	1	Difficult	Decision Tree	Correct	31.33	00:01:26
12	4	Easy	Field Guide	Correct	17.33	00:00:53
12	2	Easy	Feature Selection	Correct	36.33	00:02:44
12	3	Easy	Decision Tree	Incorrect	24.00	00:01:21
12	1	Difficult	Field Guide	Correct	31.67	00:01:08
12	5	Difficult	Feature Selection	Incorrect	39.00	00:04:16
12	6	Difficult	Decision Tree	Correct	23.67	00:00:57
13	2	Easy	Field Guide	Incorrect	62.33	00:02:55
13	3	Easy	Feature Selection	Correct	46.33	00:02:39
13	1	Easy	Decision Tree	Correct	34.33	00:02:08
13	5	Difficult	Field Guide	Incorrect	62.33	00:01:27
13	6	Difficult	Feature Selection	Incorrect	64.00	00:02:19
13	4	Difficult	Decision Tree	Incorrect	59.33	00:03:32
14	1	Easy	Field Guide	Incorrect	13.00	00:00:58
14	2	Easy	Feature Selection	Correct	22.00	00:01:49
14	6	Easy	Decision Tree	Incorrect	23.67	00:02:02
14	4	Difficult	Field Guide	Incorrect	13.33	00:01:07
14	5	Difficult	Feature Selection	Incorrect	15.00	00:01:29
14	3	Difficult	Decision Tree	Incorrect	12.67	00:00:57
15	6	Easy	Field Guide	Incorrect	61.33	00:02:17
15	1	Easy	Feature Selection	Correct	60.00	00:01:41
15	5	Easy	Decision Tree	Incorrect	61.67	00:03:45
15	3	Difficult	Field Guide	Incorrect	77.33	00:03:43
15	4	Difficult	Feature Selection	Correct	60.00	00:03:13
15	2	Difficult	Decision Tree	Incorrect	41.00	00:02:00
16	5	Easy	Field Guide	Correct	30.33	00:03:33
16	6	Easy	Feature Selection	Correct	23.67	00:02:06
16	4	Easy	Decision Tree	Incorrect	34.33	00:02:44
16	2	Difficult	Field Guide	Incorrect	29.67	00:02:30
16	3	Difficult	Feature Selection	Incorrect	48.00	00:02:59
16	1	Difficult	Decision Tree	Incorrect	43.00	00:03:43
17	4	Easy	Field Guide	Correct	18.67	00:01:41
17	5	Easy	Feature Selection	Correct	17.33	00:01:33
17	3	Easy	Decision Tree	Incorrect	52.67	00:03:11
17	1	Difficult	Field Guide	Incorrect	32.67	00:04:39
17	2	Difficult	Feature Selection	Correct	46.33	00:02:42
17	6	Difficult	Decision Tree	Incorrect	58.67	00:04:07
18	3	Easy	Field Guide	Incorrect	83.00	00:04:03
18	4	Easy	Feature Selection	Incorrect	19.00	00:02:18
18	2	Easy	Decision Tree	Incorrect	65.67	00:03:07
18	6	Difficult	Field Guide	Incorrect	79.00	00:03:37
18	1	Difficult	Feature Selection	Incorrect	47.33	00:02:52
18	5	Difficult	Decision Tree	Incorrect	46.67	00:02:51
